# Supplementary material for: Seasonal variation in the response of a monoecious crop to increased temperature and fertilizers
Source: Frontiers journal article supplement (doi:10.3389/fpls.2022.1012859), 2022-10-07
Supplement: Data_Sheet_1.pdf [file Data_Sheet_1.pdf]

## Supplementary Material

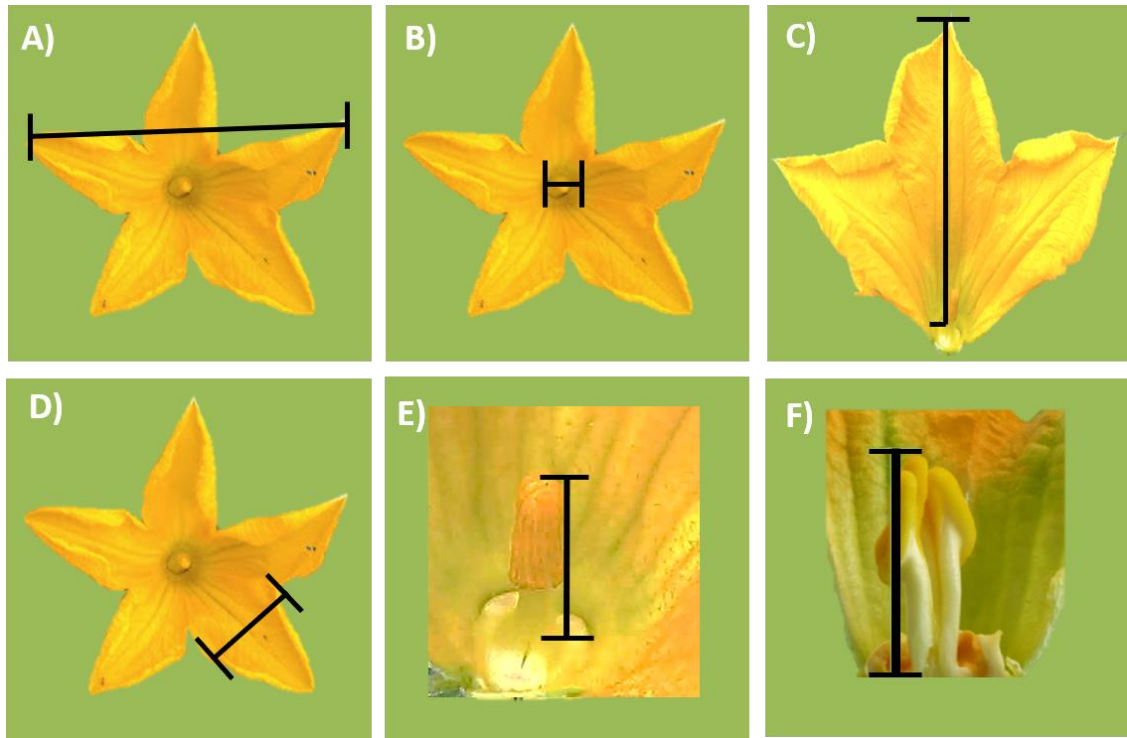

**Supplementary Figure 1.** Floral traits measured in pistillate and staminate flowers of *Cucurbita pepo*. (A) corolla diameter, (B) floral tube diameter, (C) floral tube length, (D) petal width, (E) length of stamen, (F) length of style-stigma.

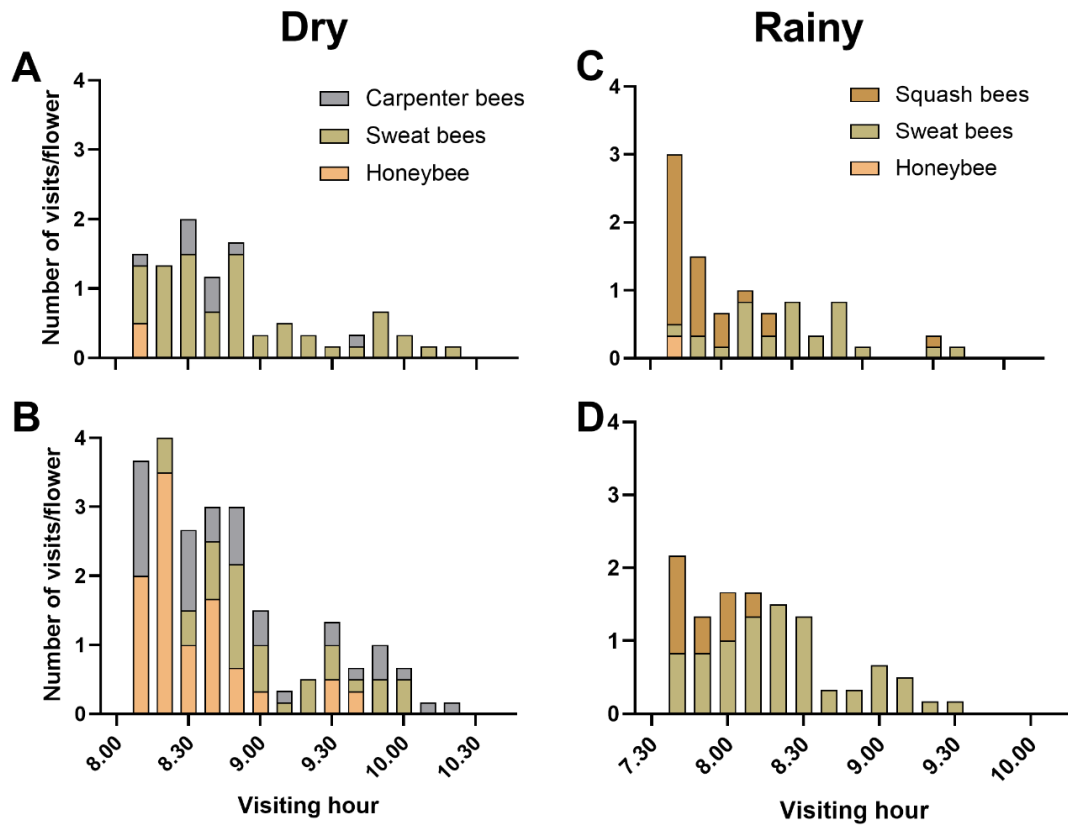

**Supplementary Figure 2.** Mean number of visits per flower in *C. pepo* flowers performed by different types of bees at 10-minute intervals from sunrise until the wilt of the flowers. Pistillate (A and C) and staminate (B and D) flowers during the dry (left) and the rainy (right) season. n=6 flowers.

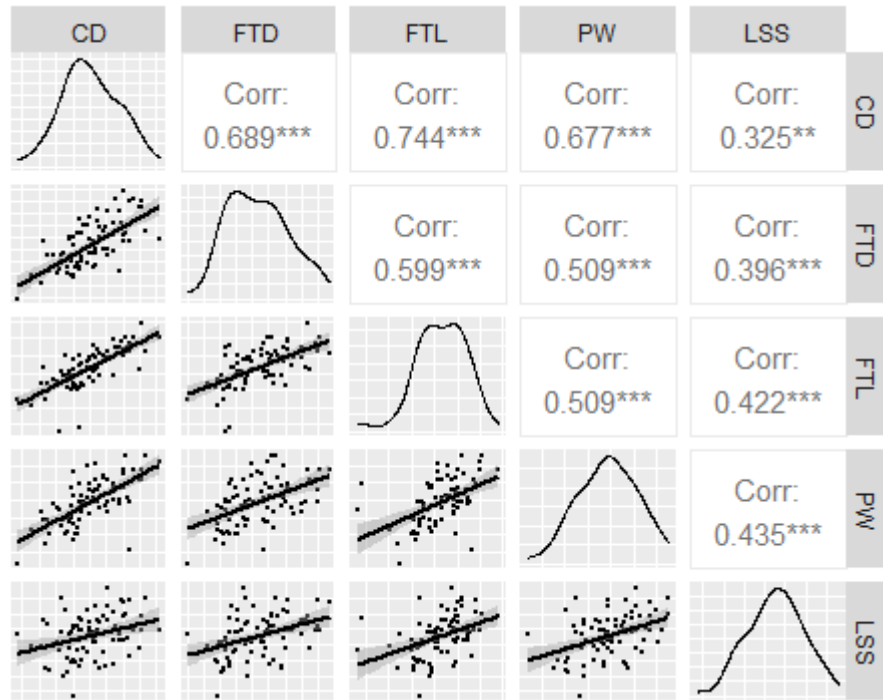

**Supplementary Figure 3.** Pearson correlations between all floral traits measured in pistillate flowers of *C. pepo* during the dry season. CD = corolla diameter; FTD = floral tube diameter; FTL = floral tube length; PW = petal width; LSS = length of style-stigma. The numeric values within the boxes are correlation coefficients between the paired traits. Statistical significance is indicated by asterisks, with \* $p < 0.05$ , \*\* $p < 0.01$ , \*\*\* $p < 0.001$ . The straight lines in the lower diagonal are the best-fitted regression line, while the grey area indicates the 95% confidence intervals. Black curves in the mean diagonal represents the densities of the variables showing the data distribution.

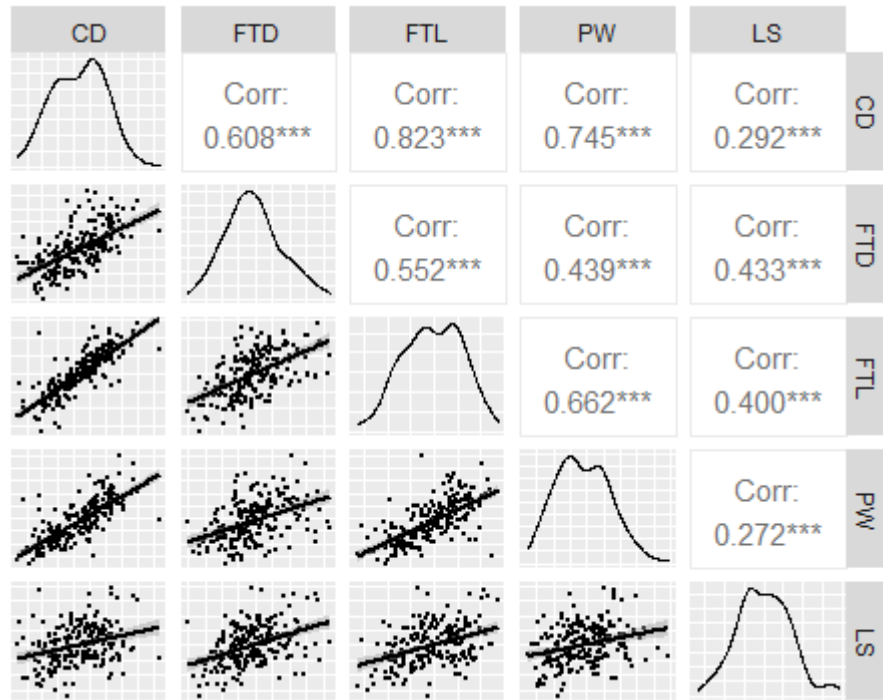

**Supplementary Figure 4.** Pearson correlations between all floral traits measured in staminate flowers of *C. pepo* during the dry season. CD = corolla diameter; FTD = floral tube diameter; FTL = floral tube length; PW = petal width; LS = length of stamen. The numeric values within the boxes are correlation coefficients between the paired traits. Statistical significance is indicated by asterisks, with \* $p < 0.05$ , \*\* $p < 0.01$ , \*\*\* $p < 0.001$ . The straight lines in the lower diagonal are the best-fitted regression line, while the grey area indicates the 95% confidence intervals. Black curves in the mean diagonal represents the densities of the variables showing the data distribution.

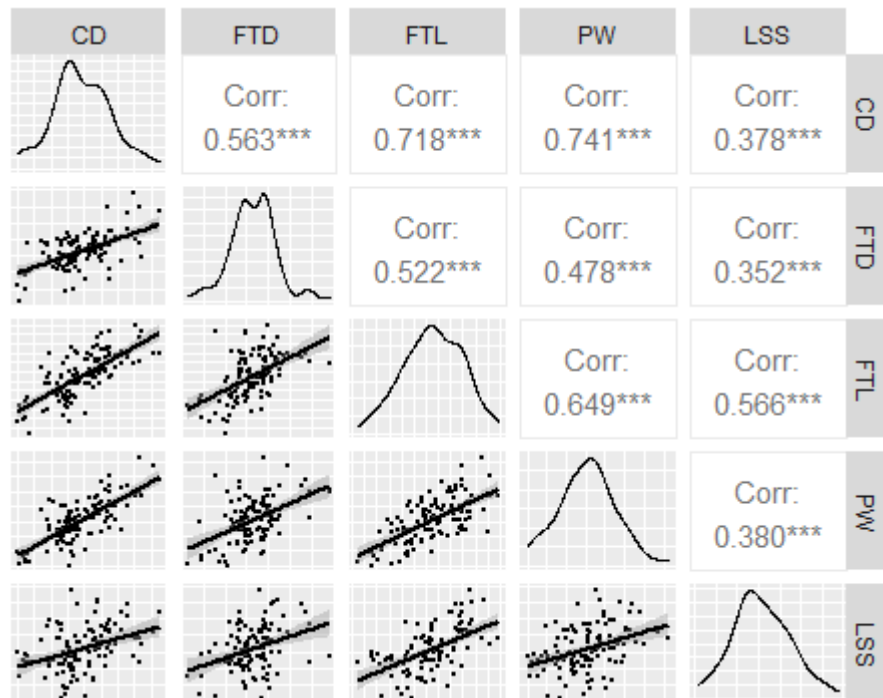

**Supplementary Figure 5.** Pearson correlations between all floral traits measured in pistillate flowers of *C. pepo* during the rainy season. CD = corolla diameter; FTD = floral tube diameter; FTL = floral tube length; PW = petal width; LSS = length of style-stigma. The numeric values within the boxes are correlation coefficients between the paired traits. Statistical significance is indicated by asterisks, with \* $p < 0.05$ , \*\* $p < 0.01$ , \*\*\* $p < 0.001$ . The straight lines in the lower diagonal are the best-fitted regression line, while the grey area indicates the 95% confidence intervals. Black curves in the mean diagonal represents the densities of the variables showing the data distribution.

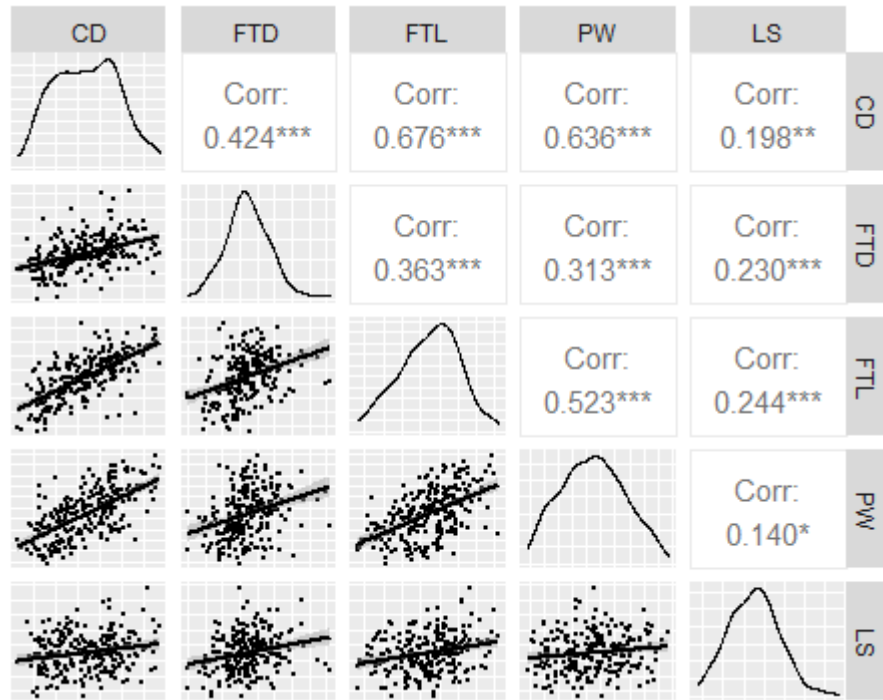

**Supplementary Figure 6.** Pearson correlations between all floral traits measured in staminate flowers of *C. pepo* during the rainy season. CD = corolla diameter; FTD = floral tube diameter; FTL= floral tube length; PW = petal width; LS = length of stamen. The numeric values within the boxes are correlation coefficients between the paired traits. Statistical significance is indicated by asterisks, with \* $p < 0.05$ , \*\* $p < 0.01$ , \*\*\* $p < 0.001$ . The straight lines in the lower diagonal are the best-fitted regression line, while the grey area indicates the 95% confidence intervals. Black curves in the mean diagonal represents the densities of the variables showing the data distribution.

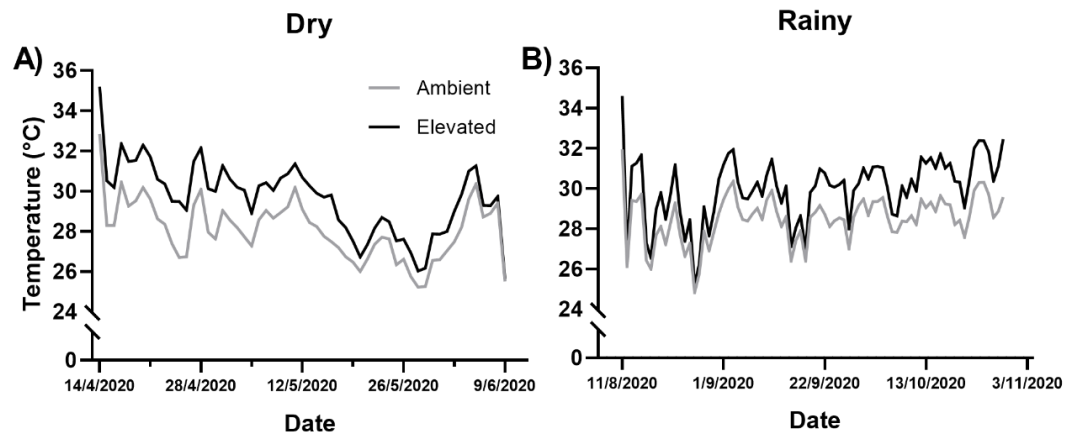

**Supplementary Figure 7.** Daily average temperature recorded inside (elevated temperature; black line) and outside (ambient temperature; gray line) the OTC during the dry (A) and the rainy season (B).

**Supplementary Table 1.** Effects of increased temperature (T) and fertilizer on vegetative and floral traits, legitimate floral visitors, and reproductive success of *C. pepo* plants during the dry season (Mean  $\pm$  SD).

| Parameters                        | No supplementary fertilizer |                     | Organic fertilizer |                     | Synthetic fertilizer |                     |
|-----------------------------------|-----------------------------|---------------------|--------------------|---------------------|----------------------|---------------------|
|                                   | Ambient                     | Elevated            | Ambient            | Elevated            | Ambient              | Elevated            |
| <b>Vegetative traits</b>          |                             |                     |                    |                     |                      |                     |
| Plant height                      | 27.50 $\pm$ 2.12            | 34.70 $\pm$ 2.54    | 28.80 $\pm$ 3.08   | 34.40 $\pm$ 3.10    | 30.10 $\pm$ 2.51     | 34.40 $\pm$ 2.17    |
| Number of leaves                  | 12.00 $\pm$ 1.83            | 15.00 $\pm$ 2.36    | 14.60 $\pm$ 4.14   | 17.20 $\pm$ 4.83    | 18.20 $\pm$ 3.46     | 18.90 $\pm$ 3.38    |
| Leaf area                         | 226.65 $\pm$ 91.07          | 197.86 $\pm$ 41.87  | 220.02 $\pm$ 59.30 | 272.00 $\pm$ 52.39  | 337.77 $\pm$ 93.19   | 374.64 $\pm$ 120.08 |
| <b>Floral traits</b>              |                             |                     |                    |                     |                      |                     |
| <i>Pistillate flowers</i>         |                             |                     |                    |                     |                      |                     |
| Timing of flowering               | 34.93 $\pm$ 6.86            | 34.82 $\pm$ 5.20    | 31.58 $\pm$ 4.60   | 32.13 $\pm$ 4.52    | 33.00 $\pm$ 3.46     | 33.35 $\pm$ 3.14    |
| Number of flowers                 | 2.00 $\pm$ 1.93             | 2.47 $\pm$ 1.18     | 2.07 $\pm$ 1.38    | 2.47 $\pm$ 1.41     | 2.87 $\pm$ 1.51      | 4.59 $\pm$ 2.48     |
| Corolla diameter                  | 71.12 $\pm$ 17.17           | 64.97 $\pm$ 11.56   | 65.10 $\pm$ 7.53   | 69.35 $\pm$ 15.52   | 73.59 $\pm$ 13.14    | 71.63 $\pm$ 19.32   |
| Nectar volume                     | 42.24 $\pm$ 20.41           | 53.35 $\pm$ 19.99   | 43.16 $\pm$ 12.30  | 48.90 $\pm$ 25.58   | 36.51 $\pm$ 28.35    | 51.39 $\pm$ 15.73   |
| Sugar concentration               | 32.38 $\pm$ 4.73            | 34.95 $\pm$ 2.58    | 32.93 $\pm$ 4.60   | 31.84 $\pm$ 4.79    | 27.43 $\pm$ 4.53     | 39.30 $\pm$ 3.88    |
| Flower sex ratio                  | 0.19 $\pm$ 0.16             | 0.14 $\pm$ 0.09     | 0.08 $\pm$ 0.06    | 0.13 $\pm$ 0.07     | 0.15 $\pm$ 0.09      | 0.25 $\pm$ 0.12     |
| <i>Staminate flowers</i>          |                             |                     |                    |                     |                      |                     |
| Timing of flowering               | 32.75 $\pm$ 6.90            | 29.71 $\pm$ 1.83    | 33.21 $\pm$ 6.27   | 29.47 $\pm$ 1.96    | 37.60 $\pm$ 7.26     | 29.82 $\pm$ 2.35    |
| Number of flowers                 | 9.38 $\pm$ 4.54             | 17.41 $\pm$ 5.59    | 25.50 $\pm$ 15.32  | 20.93 $\pm$ 10.39   | 19.93 $\pm$ 11.71    | 16.47 $\pm$ 10.62   |
| Corolla diameter                  | 70.35 $\pm$ 14.96           | 90.83 $\pm$ 17.96   | 63.81 $\pm$ 17.40  | 92.11 $\pm$ 16.68   | 68.52 $\pm$ 12.77    | 78.53 $\pm$ 14.09   |
| Nectar volume                     | 29.82 $\pm$ 11.56           | 22.11 $\pm$ 9.88    | 18.56 $\pm$ 4.25   | 33.88 $\pm$ 18.75   | 16.45 $\pm$ 6.74     | 27.09 $\pm$ 17.16   |
| Sugar concentration               | 35.14 $\pm$ 2.42            | 37.36 $\pm$ 2.90    | 31.29 $\pm$ 3.80   | 32.07 $\pm$ 4.66    | 30.92 $\pm$ 6.08     | 38.03 $\pm$ 2.41    |
| <b>Legitimate floral visitors</b> |                             |                     |                    |                     |                      |                     |
| <i>Pistillate flowers</i>         |                             |                     |                    |                     |                      |                     |
| Number of legitimate visits       | 0.25 $\pm$ 0.50             | 1.67 $\pm$ 1.15     | 10.50 $\pm$ 2.52   | 4.25 $\pm$ 3.86     | 1.25 $\pm$ 0.96      | 2.00 $\pm$ 1.00     |
| Duration of visit                 | 5.00                        | 12.60 $\pm$ 14.99   | 16.24 $\pm$ 15.28  | 14.35 $\pm$ 11.51   | 6.00 $\pm$ 1.22      | 8.20 $\pm$ 10.83    |
| <i>Staminate flowers</i>          |                             |                     |                    |                     |                      |                     |
| Number of legitimate visits       | 8.38 $\pm$ 9.87             | 8.75 $\pm$ 6.67     | 4.78 $\pm$ 4.49    | 10.50 $\pm$ 9.14    | 8.17 $\pm$ 7.83      | 4.38 $\pm$ 4.27     |
| Duration of visit                 | 24.22 $\pm$ 88.89           | 22.16 $\pm$ 29.15   | 27.00 $\pm$ 51.04  | 18.44 $\pm$ 28.83   | 7.39 $\pm$ 7.95      | 22.40 $\pm$ 43.22   |
| <b>Reproductive success</b>       |                             |                     |                    |                     |                      |                     |
| Fruit set                         | 0.45 $\pm$ 0.52             | 0.35 $\pm$ 0.49     | 0.80 $\pm$ 0.45    | 0.58 $\pm$ 0.51     | 0.33 $\pm$ 0.49      | 0.16 $\pm$ 0.37     |
| Number of seeds                   | 165.20 $\pm$ 82.77          | 118.17 $\pm$ 104.42 | 130.00 $\pm$ 73.54 | 113.00 $\pm$ 106.07 | 147.40 $\pm$ 58.24   | 216.33 $\pm$ 65.29  |



**Supplementary Table 2.** Effects of increased temperature (T) and fertilizer on vegetative and floral traits, legitimate floral visitors, and reproductive success of *C. pepo* plants during the rainy season (Mean  $\pm$  SD).

| Parameters                        | No supplementary fertilizer |                    | Organic fertilizer |                    | Synthetic fertilizer |                    |
|-----------------------------------|-----------------------------|--------------------|--------------------|--------------------|----------------------|--------------------|
|                                   | Ambient                     | Elevated           | Ambient            | Elevated           | Ambient              | Elevated           |
| <b>Vegetative traits</b>          |                             |                    |                    |                    |                      |                    |
| Plant height                      | 22.94 $\pm$ 3.33            | 24.97 $\pm$ 3.20   | 25.91 $\pm$ 3.28   | 27.06 $\pm$ 3.14   | 28.47 $\pm$ 5.88     | 32.19 $\pm$ 5.08   |
| Number of leaves                  | 10.76 $\pm$ 2.99            | 11.35 $\pm$ 2.15   | 13.18 $\pm$ 2.46   | 12.00 $\pm$ 1.97   | 14.22 $\pm$ 3.51     | 14.50 $\pm$ 4.25   |
| Leaf area                         | 57.42 $\pm$ 17.27           | 67.23 $\pm$ 17.74  | 101.37 $\pm$ 24.20 | 92.93 $\pm$ 28.22  | 221.27 $\pm$ 86.71   | 278.46 $\pm$ 52.47 |
| <b>Floral traits</b>              |                             |                    |                    |                    |                      |                    |
| <i>Pistillate flowers</i>         |                             |                    |                    |                    |                      |                    |
| Timing of flowering               | 40.60 $\pm$ 7.97            | 40.06 $\pm$ 5.40   | 37.44 $\pm$ 7.88   | 40.29 $\pm$ 6.78   | 39.94 $\pm$ 4.92     | 37.22 $\pm$ 4.98   |
| Number of flowers                 | 2.00 $\pm$ 1.66             | 2.88 $\pm$ 1.22    | 1.76 $\pm$ 1.52    | 2.82 $\pm$ 1.47    | 3.39 $\pm$ 1.82      | 4.28 $\pm$ 2.72    |
| Corolla diameter                  | 71.40 $\pm$ 11.80           | 87.58 $\pm$ 12.99  | 79.87 $\pm$ 10.21  | 82.97 $\pm$ 15.15  | 94.55 $\pm$ 14.01    | 101.26 $\pm$ 15.44 |
| Nectar volume                     | 50.60 $\pm$ 36.88           | 62.18 $\pm$ 21.30  | 56.40 $\pm$ 15.31  | 49.09 $\pm$ 23.61  | 97.57 $\pm$ 53.38    | 60.31 $\pm$ 34.24  |
| Sugar concentration               | 34.23 $\pm$ 3.78            | 32.74 $\pm$ 3.66   | 36.68 $\pm$ 2.89   | 32.88 $\pm$ 5.27   | 34.23 $\pm$ 4.09     | 31.67 $\pm$ 5.90   |
| Flower sex ratio                  | 0.17 $\pm$ 0.14             | 0.19 $\pm$ 0.09    | 0.14 $\pm$ 0.09    | 0.16 $\pm$ 0.08    | 0.24 $\pm$ 0.11      | 0.23 $\pm$ 0.09    |
| <i>Staminate flowers</i>          |                             |                    |                    |                    |                      |                    |
| Timing of flowering               | 29.59 $\pm$ 4.18            | 28.59 $\pm$ 4.32   | 28.24 $\pm$ 3.31   | 31.65 $\pm$ 5.22   | 30.78 $\pm$ 3.73     | 31.50 $\pm$ 5.19   |
| Number of flowers                 | 10.35 $\pm$ 4.33            | 13.29 $\pm$ 4.66   | 11.82 $\pm$ 6.99   | 14.76 $\pm$ 3.58   | 12.22 $\pm$ 6.34     | 14.61 $\pm$ 7.35   |
| Corolla diameter                  | 66.93 $\pm$ 12.47           | 78.90 $\pm$ 8.95   | 70.73 $\pm$ 9.81   | 75.80 $\pm$ 9.68   | 70.06 $\pm$ 11.92    | 78.73 $\pm$ 10.06  |
| Nectar volume                     | 18.24 $\pm$ 7.15            | 18.61 $\pm$ 11.28  | 25.79 $\pm$ 18.77  | 16.61 $\pm$ 7.27   | 17.90 $\pm$ 9.59     | 15.42 $\pm$ 5.53   |
| Sugar concentration               | 30.95 $\pm$ 5.16            | 32.96 $\pm$ 5.75   | 30.36 $\pm$ 5.28   | 32.54 $\pm$ 4.19   | 30.48 $\pm$ 5.81     | 33.72 $\pm$ 6.60   |
| <b>Legitimate floral visitors</b> |                             |                    |                    |                    |                      |                    |
| <i>Pistillate flowers</i>         |                             |                    |                    |                    |                      |                    |
| Number of legitimate visits       | 7.20 $\pm$ 4.44             | 11.33 $\pm$ 13.98  | 5.00 $\pm$ 5.18    | 7.00 $\pm$ 9.59    | 2.80 $\pm$ 3.03      | 8.83 $\pm$ 3.13    |
| Duration of visit                 | 34.55 $\pm$ 57.81           | 23.81 $\pm$ 50.92  | 18.73 $\pm$ 21.21  | 12.39 $\pm$ 14.52  | 14.86 $\pm$ 11.91    | 26.25 $\pm$ 29.52  |
| <i>Staminate flowers</i>          |                             |                    |                    |                    |                      |                    |
| Number of legitimate visits       | 5.25 $\pm$ 3.74             | 7.60 $\pm$ 8.72    | 5.00 $\pm$ 4.15    | 5.67 $\pm$ 4.50    | 8.70 $\pm$ 7.21      | 3.50 $\pm$ 1.07    |
| Duration of visit                 | 73.24 $\pm$ 224.57          | 36.04 $\pm$ 112.49 | 79.71 $\pm$ 291.33 | 49.22 $\pm$ 102.26 | 58.55 $\pm$ 220.48   | 49.46 $\pm$ 51.75  |
| <b>Reproductive success</b>       |                             |                    |                    |                    |                      |                    |
| Fruit set                         | 0.14 $\pm$ 0.38             | 0.35 $\pm$ 0.49    | 0.33 $\pm$ 0.49    | 0.17 $\pm$ 0.38    | 0.47 $\pm$ 0.51      | 0.35 $\pm$ 0.48    |
| Number of seeds                   | 68.00                       | 142.83 $\pm$ 69.82 | 101.60 $\pm$ 24.89 | 142.25 $\pm$ 14.38 | 186.21 $\pm$ 84.88   | 196.45 $\pm$ 74.82 |

**Supplementary Table 3.** Results of analyses testing the effects of temperature, fertilization, and their interaction on vegetative and floral traits, legitimate floral visitors, and reproductive success of *C. pepo* during the dry and the rainy seasons. ANOVA (F) or GLM ( $\chi^2$ ) and p values are shown. Statistical significance is indicated by asterisks, with \*p < 0.05, \*\*p < 0.01, \*\*\*p < 0.001.

| Parameters                        | Dry season             |                        |                        | Rainy season           |                         |                        |
|-----------------------------------|------------------------|------------------------|------------------------|------------------------|-------------------------|------------------------|
|                                   | Temperature            | Fertilizer             | T*F                    | Temperature            | Fertilizer              | T*F                    |
| <b>Vegetative traits</b>          |                        |                        |                        |                        |                         |                        |
| Plant height                      | $F_{1,54}=71.15^{***}$ | $F_{2,54}=0.97$        | $F_{2,54}=1.54$        | $\chi^2_1=8.04^{**}$   | $\chi^2_2=21.53^{***}$  | $\chi^2_2=0.61$        |
| Number of leaves                  | $\chi^2_1=4.69^*$      | $\chi^2_2=8.18^{***}$  | $\chi^2_2=0.73$        | $\chi^2_1=0.02$        | $\chi^2_2=7.52^{***}$   | $\chi^2_2=0.61$        |
| Leaf area                         | $\chi^2_1=0.65$        | $\chi^2_2=17.38^{***}$ | $\chi^2_2=1.92$        | $\chi^2_1=1.81$        | $\chi^2_2=120.37^{***}$ | $\chi^2_2=1.66$        |
| <b>Floral traits</b>              |                        |                        |                        |                        |                         |                        |
| <i>Pistillate flowers</i>         |                        |                        |                        |                        |                         |                        |
| Timing of flowering               | $\chi^2_1=0.05$        | $\chi^2_2=1.97$        | $\chi^2_2=0.03$        | $\chi^2_1=0.01$        | $\chi^2_2=0.76$         | $\chi^2_2=1.74$        |
| Number of flowers                 | $\chi^2_1=4.80^*$      | $\chi^2_2=7.13^{**}$   | $\chi^2_2=0.59$        | $\chi^2_1=8.56^{**}$   | $\chi^2_2=9.00^{***}$   | $\chi^2_2=0.35$        |
| Corolla diameter                  | $F_{1,49}=0.09$        | $F_{2,49}=0.67$        | $F_{2,49}=0.49$        | $F_{1,65}=7.18^{**}$   | $F_{2,65}=13.39^{***}$  | $F_{2,79}=1.37$        |
| Nectar volume                     | $F_{1,26}=1.95$        | $F_{2,26}=0.09$        | $F_{2,26}=0.12$        | $\chi^2_1=0.53$        | $\chi^2_2=1.45$         | $\chi^2_2=1.07$        |
| Sugar concentration               | $F_{1,26}=8.80^{**}$   | $F_{2,26}=0.25$        | $F_{2,26}=7.097^{**}$  | $\chi^2_1=2.56$        | $\chi^2_2=0.42$         | $\chi^2_2=0.16$        |
| Flower sex ratio                  | $\chi^2_1=3.92^*$      | $\chi^2_2=13.71^{**}$  | $\chi^2_2=4.26$        | $\chi^2_1=1.89$        | $\chi^2_2=13.85^{***}$  | $\chi^2_2=0.76$        |
| <i>Staminate flowers</i>          |                        |                        |                        |                        |                         |                        |
| Timing of flowering               | $\chi^2_1=16.73^{***}$ | $\chi^2_2=1.67$        | $\chi^2_2=1.35$        | $\chi^2_1=0.92$        | $\chi^2_2=1.25$         | $\chi^2_2=1.41$        |
| Number of flowers                 | $\chi^2_1=2.32$        | $\chi^2_2=43.87^{***}$ | $\chi^2_2=24.96^{***}$ | $\chi^2_1=15.45^{***}$ | $\chi^2_2=2.17$         | $\chi^2_2=0.14$        |
| Corolla diameter                  | $F_{1,73}=30.22^{***}$ | $F_{2,73}=1.33$        | $F_{2,73}=2.28$        | $F_{1,79}=13.37^{***}$ | $F_{2,79}=0.15$         | $F_{2,79}=0.71$        |
| Nectar volume                     | $F_{1,30}=2.16$        | $F_{2,30}=0.47$        | $F_{2,30}=3.10$        | $\chi^2_1=1.77$        | $\chi^2_2=0.80$         | $\chi^2_2=0.93$        |
| Sugar concentration               | $F_{1,30}=7.06^*$      | $F_{2,30}=4.52^*$      | $F_{2,30}=2.15$        | $\chi^2_1=2.76$        | $\chi^2_2=0.07$         | $\chi^2_2=0.06$        |
| <b>Legitimate floral visitors</b> |                        |                        |                        |                        |                         |                        |
| <i>Pistillate flowers</i>         |                        |                        |                        |                        |                         |                        |
| Number of legitimate visits       | $\chi^2_1=1.30$        | $\chi^2_2=16.02^{***}$ | $\chi^2_2=4.67^*$      | $\chi^2_1=20.44^{***}$ | $\chi^2_2=6.71^{**}$    | $\chi^2_2=2.54$        |
| Duration of visit                 | $\chi^2_1=0.84$        | $\chi^2_2=3.46^*$      | $\chi^2_2=0.66$        | $\chi^2_1=0.21$        | $\chi^2_2=6.89^{**}$    | $\chi^2_2=3.33^*$      |
| <i>Staminate flowers</i>          |                        |                        |                        |                        |                         |                        |
| Number of legitimate visits       | $\chi^2_1=0.37$        | $\chi^2_2=3.41^*$      | $\chi^2_2=11.44^{***}$ | $\chi^2_1=1.46$        | $\chi^2_2=0.96$         | $\chi^2_2=11.25^{***}$ |
| Duration of visit                 | $\chi^2_1=2.05$        | $\chi^2_2=5.84^{**}$   | $\chi^2_2=8.14^{***}$  | $\chi^2_1=7.45^{**}$   | $\chi^2_2=0.54$         | $\chi^2_2=0.93$        |
| <b>Reproductive success</b>       |                        |                        |                        |                        |                         |                        |
| Fruit set                         | $\chi^2_1=0.15$        | $\chi^2_2=3.71^*$      | $\chi^2_2=2.07$        | $\chi^2_1=0.02$        | $\chi^2_2=2.18$         | $\chi^2_2=1.15$        |
| Number of seeds                   | $\chi^2_1=0.61$        | $\chi^2_2=35.69^{***}$ | $\chi^2_2=47.91^{***}$ | $\chi^2_1=63.35^{***}$ | $\chi^2_2=141.96^{***}$ | $\chi^2_2=21.94^{***}$ |

**Supplementary Table 4.** Importance of legitimate floral visitors of *C. pepo* during the dry season.

| Family       | Species                     | Common name   | Total of visits | Legitim visits to pistillate flowers | Legitim visits to staminate flowers | Importance value (%) |
|--------------|-----------------------------|---------------|-----------------|--------------------------------------|-------------------------------------|----------------------|
| Apidae       | <i>Peponapis</i> sp 1       | Squash bee    | 0               | 0                                    | 0                                   | 0.0                  |
|              | <i>Peponapis</i> sp 2       | Squash bee    | 0               | 0                                    | 0                                   | 0.0                  |
|              | <i>Apis mellifera</i>       | Honeybee      | 258             | 1                                    | 178                                 | 1.8                  |
|              | <i>Xylocopa</i> sp 1        | Carpenter bee | 87              | 10                                   | 77                                  | 23.1                 |
|              | <i>Trigona fulviventris</i> | Stingless bee | 1               | 0                                    | 0                                   | 0.0                  |
| Halictidae   | <i>Halictidae</i> sp1       | Sweat bee     | 155             | 65                                   | 68                                  | 74.4                 |
|              | <i>Halictidae</i> sp2       | Sweat bee     | 4               | 0                                    | 4                                   | 0.0                  |
| Vespidae     | <i>Polybia occidentalis</i> | Social wasp   | 314             | 8                                    | 11                                  | 0.7                  |
| <b>Total</b> | <b>6 species</b>            |               | <b>819</b>      | <b>84</b>                            | <b>338</b>                          | <b>100.0</b>         |

**Supplementary Table 5.** Importance of legitimate floral visitors of *C. pepo* during the rainy season.

| Family       | Species                     | Common name   | Total of visits | Legitim visits to pistillate flowers | Legitim visits to staminate flowers | Importance value (%) |
|--------------|-----------------------------|---------------|-----------------|--------------------------------------|-------------------------------------|----------------------|
| Apidae       | <i>Peponapis</i> sp 1       | Squash bee    | 337             | 149                                  | 188                                 | 60.2                 |
|              | <i>Peponapis</i> sp 2       | Squash bee    | 92              | 37                                   | 55                                  | 16.0                 |
|              | <i>Apis mellifera</i>       | Honeybee      | 48              | 30                                   | 14                                  | 6.3                  |
|              | <i>Xylocopa</i> sp 1        | Carpenter bee | 0               | 0                                    | 0                                   | 0.0                  |
|              | <i>Trigona fulviventris</i> | Stingless bee | 4               | 0                                    | 0                                   | 0.0                  |
| Halictidae   | <i>Halictidae</i> sp1       | Sweat bee     | 45              | 14                                   | 25                                  | 5.6                  |
|              | <i>Halictidae</i> sp2       | Sweat bee     | 113             | 27                                   | 68                                  | 11.8                 |
| Vespidae     | <i>Polybia occidentalis</i> | Social wasp   | 15              | 0                                    | 0                                   | 0.0                  |
| <b>Total</b> | <b>7 species</b>            |               | <b>654</b>      | <b>257</b>                           | <b>350</b>                          | <b>100.0</b>         |
